# Supplementary material for: Phase Transition Thermodynamics of 1,3,5-Tris-(α-naphthyl)benzene: Theory and Experiment
Source: MDPI journal article supplement (doi:10.3390/molecules29102180), 2024-05-07
Supplement: s1 [file s1]

# Supplementary Material

## Phase Transition Thermodynamics of 1,3,5-tris-( $\alpha$ -naphthyl)benzene: theory and experiment

Mikhail I. Yagofarov<sup>1</sup>, Dmitrii N. Bolmatenkov, Airat A. Notfullin, Andrey A. Sokolov,  
Ilya S. Balakhontsev, Timur A. Mukhametzyanov, and Boris N. Solomonov<sup>2</sup>

*Department of Physical Chemistry, Kazan Federal University, Kremlevskaya str. 18, 420008  
Kazan, Russia*

### 1 Materials

**Table S1**

Provenance and purity of the materials.

| Chemical Name         | CASRN      | Source                | Sample purity                             | Purification method |
|-----------------------|------------|-----------------------|-------------------------------------------|---------------------|
| TNB                   | 15546-43-7 | Hotspot Biotechnology | >0.98 <sup>a</sup><br>>0.997 <sup>c</sup> | sublimation         |
| biphenyl              | 92-52-4    | Aldrich               | 0.999 <sup>c</sup>                        | none                |
| benzoic acid          | 65-85-0    | Aldrich               | 0.999 <sup>c</sup>                        | none                |
| anthracene            | 120-12-7   | Aldrich               | 0.999 <sup>c</sup>                        | none                |
| indium                | 7440-74-6  | PerkinElmer           | 0.99999 <sup>a</sup>                      | none                |
| zinc                  | 7440-66-6  | PerkinElmer           | 0.99999 <sup>a</sup>                      | none                |
| sapphire <sup>d</sup> | 1344-28-1  | PerkinElmer           | not provided                              | none                |

<sup>a</sup> Initial purity stated by supplier;

<sup>b</sup> Purity after fractional sublimation *in vacuo* determined by HPLC (mole fraction);

<sup>c</sup> Purity determined by GC (mass fraction);

<sup>d</sup> Sapphire disc provided by Perkin Elmer (USA) as a reference material for the heat capacity measurements.

<sup>1</sup> To whom correspondence should be addressed: M. I. Yagofarov, MiIYagofarov@kpfu.ru

<sup>2</sup> To whom correspondence should be addressed: B. N. Solomonov, boris.solomonov@kpfu.ru

## 2 Differential scanning calorimetry

**Table S2**

Enthalpies and temperatures of fusion of TNP measured in this work at  $10^5$  Pa.

| Sample mass / mg                                            | $T_m$ / K                    | $\Delta_{cr}^1 H(T_m)$ / kJ mol <sup>-1</sup> |
|-------------------------------------------------------------|------------------------------|-----------------------------------------------|
| Pre-melted samples                                          |                              |                                               |
| Heating rate 1 K min <sup>-1</sup>                          |                              |                                               |
| 7.32                                                        | 457.6                        | 33.21                                         |
| 6.91                                                        | 457.7                        | 32.85                                         |
| Heating rate 2 K min <sup>-1</sup>                          |                              |                                               |
| 6.43                                                        | 457.8                        | 32.33                                         |
| 6.85                                                        | 457.7                        | 32.92                                         |
| Heating rate 5 K min <sup>-1</sup>                          |                              |                                               |
| 5.45                                                        | 458.0                        | 32.74                                         |
| 4.98                                                        | 457.8                        | 32.61                                         |
| Heating rate 10 K min <sup>-1</sup>                         |                              |                                               |
| 4.21                                                        | 458.2                        | 33.10                                         |
| 3.89                                                        | 458.2                        | 32.35                                         |
| <b>Average</b>                                              | <b>457.9±0.3<sup>a</sup></b> | <b>32.8±0.5<sup>a</sup></b>                   |
| Non-pre-melted samples, heating rate 10 K min <sup>-1</sup> |                              |                                               |
| 4.14                                                        | 458.2                        | 33.19                                         |
| 4.71                                                        | 459.0                        | 33.12                                         |
| 4.88                                                        | 458.5                        | 32.29                                         |

<sup>a</sup>The uncertainties reported inside Table S2 include the expanded uncertainty of the mean  $U$  (0.95 level of confidence, coverage factor of 2.0) and reproducibility of calibration (0.1 K for temperature and 1 % for enthalpy); the standard uncertainty of pressure  $u(p) = 5 \cdot 10^3$  Pa.

**Table S3**

Isobaric heat capacities of crystalline and liquid TNB measured in this work using DSC at the pressure of  $10^5$  Pa.

| $T / \text{K}$ | $C_{p,m} / \text{J K}^{-1} \text{mol}^{-1}$<br><sup>a</sup> | $u(C_{p,m}) / \text{J K}^{-1} \text{mol}^{-1}$ | $T / \text{K}$ | $C_{p,m} / \text{J K}^{-1} \text{mol}^{-1}$<br><sup>a</sup> | $u(C_{p,m}) / \text{J K}^{-1} \text{mol}^{-1}$ |
|----------------|-------------------------------------------------------------|------------------------------------------------|----------------|-------------------------------------------------------------|------------------------------------------------|
| TNB (cr)       |                                                             |                                                | TNB (l)        |                                                             |                                                |
| 280            | 477.1                                                       | 14.3                                           | 420            | 835.2                                                       | 25.1                                           |
| 290            | 495.0                                                       | 14.8                                           | 430            | 846.8                                                       | 25.4                                           |
| 300            | 512.9                                                       | 15.4                                           | 440            | 858.5                                                       | 25.8                                           |
| 310            | 530.8                                                       | 15.9                                           | 450            | 870.2                                                       | 26.1                                           |
| 320            | 548.7                                                       | 16.5                                           | 460            | 881.8                                                       | 26.5                                           |
| 330            | 566.6                                                       | 17.0                                           | 470            | 893.5                                                       | 26.8                                           |
| 340            | 584.5                                                       | 17.5                                           | 480            | 905.1                                                       | 27.2                                           |
| 350            | 602.4                                                       | 18.1                                           | 490            | 916.8                                                       | 27.5                                           |
| 360            | 620.3                                                       | 18.6                                           | 500            | 928.5                                                       | 27.9                                           |
| 370            | 638.2                                                       | 19.1                                           | 510            | 940.1                                                       | 28.2                                           |
| 380            | 656.2                                                       | 19.7                                           |                |                                                             |                                                |
| 390            | 674.1                                                       | 20.2                                           |                |                                                             |                                                |
| 400            | 692.0                                                       | 20.8                                           |                |                                                             |                                                |
| 410            | 709.9                                                       | 21.3                                           |                |                                                             |                                                |
| 420            | 727.8                                                       | 21.8                                           |                |                                                             |                                                |
| 430            | 745.7                                                       | 22.4                                           |                |                                                             |                                                |

<sup>a</sup> The uncertainties include the expanded uncertainty of the mean  $U$  (0.95 level of confidence, coverage factor of 2.0) and the uncertainty of calibration; the standard uncertainty of pressure  $u(p) = 5 \cdot 10^3$  Pa. The expanded uncertainty of temperature is  $\pm 0.1$  K (0.95 level of confidence, coverage factor of 2.0).

### 3 Solution calorimetry

**Table S4**

Experimental enthalpies of solution of TNB in benzene measured in this work at 298.15 K and 0.1 MPa <sup>a</sup>.

| Mass of sample / mg                                                                               | Molality <sup>b</sup> / mmol·kg <sup>-1</sup> | $\Delta_{\text{soln}}H^{\text{A/S}}$ <sup>c</sup> / kJ mol <sup>-1</sup> |
|---------------------------------------------------------------------------------------------------|-----------------------------------------------|--------------------------------------------------------------------------|
| 40.2                                                                                              | 1.00                                          | 14.88                                                                    |
| 45.7                                                                                              | 2.14                                          | 15.60                                                                    |
| 45.0                                                                                              | 3.26                                          | 14.54                                                                    |
| 45.3                                                                                              | 4.39                                          | 16.03                                                                    |
| 41.2                                                                                              | 5.41                                          | 15.01                                                                    |
| 42.1                                                                                              | 6.47                                          | 14.75                                                                    |
| $\Delta_{\text{soln}}H^{\text{A/S}} = 15.13 \pm 0.46 \text{ kJ}\cdot\text{mol}^{-1}$ <sup>d</sup> |                                               |                                                                          |

<sup>a</sup> Standard uncertainties  $u$  are  $u(T) = 0.01 \text{ K}$ ,  $u(p) = 5 \text{ kPa}$ .

<sup>b</sup> Molality of the solute in solution after experiments. Standard uncertainty  $u$  is  $0.01 \text{ mmol}\cdot\text{kg}^{-1}$ .

<sup>c</sup> The experimental value obtained on each sample dissolution, assumed to correspond to the solution enthalpies at the infinite dilution.

<sup>d</sup> Average enthalpy of solution. Uncertainties reported inside Table S4 correspond to the combined expanded uncertainties of the mean  $U$  and the calibration reproducibilities (0.1 %), 0.95 level of confidence, coverage factor 2.0.

#### *4 Powder X-ray diffraction*

X-ray powder diffraction (XRPD) pattern of TNB was determined using a MiniFlex 600 diffractometer (Rigaku) equipped with a D/teX Ultra detector as reported previously [2]. In this experiment, Cu K $\alpha$  radiation (40 kV, 15 mA) was used and data were collected at room temperature in the range of  $2\theta$  from 3 to 50° with a step of 0.02° and exposure time at each point of 0.24 s without sample rotation.

PXRD patterns of commercial TNB and the sample after fractional sublimation *in vacuo* and annealing at 443 K are provided in Figure 1.

**Table S5**

Cartesian coordinates for TNB optimized with B3LYP/6-31+G(d,p).

| Atom | X         | Y         | Z         |
|------|-----------|-----------|-----------|
| C    | -3.548334 | -1.246553 | 0.196101  |
| C    | -2.862686 | -0.497731 | -0.822091 |
| C    | -3.586717 | 0.012054  | -1.888318 |
| C    | -4.978585 | -0.206743 | -2.013862 |
| C    | -5.650716 | -0.942957 | -1.065244 |
| C    | -4.960712 | -1.474123 | 0.057952  |
| C    | -2.899668 | -1.750605 | 1.359989  |
| C    | -3.595427 | -2.460732 | 2.315663  |
| C    | -4.981786 | -2.705353 | 2.162555  |
| C    | -5.645888 | -2.217166 | 1.059245  |
| C    | -1.391354 | -0.249413 | -0.766400 |
| C    | -0.474501 | -1.313580 | -0.764042 |
| C    | 0.907929  | -1.083017 | -0.764172 |
| C    | 1.370963  | 0.243110  | -0.765832 |
| C    | 0.480122  | 1.325022  | -0.767676 |
| C    | -0.899917 | 1.063059  | -0.768172 |
| C    | 1.858694  | -2.232968 | -0.817805 |
| C    | 1.773778  | -3.121663 | -1.878053 |
| C    | 2.659830  | -4.217276 | -2.002341 |
| C    | 3.639710  | -4.424076 | -1.058535 |
| C    | 3.760596  | -3.553842 | 0.058537  |
| C    | 2.856459  | -2.445019 | 0.195673  |
| C    | 1.001090  | 2.723224  | -0.823307 |
| C    | 1.808686  | 3.093992  | -1.886948 |
| C    | 2.316357  | 4.408337  | -2.011690 |
| C    | 2.012111  | 5.359421  | -1.064870 |
| C    | 1.202118  | 5.029126  | 0.055259  |
| C    | 0.691536  | 3.692670  | 0.192501  |
| C    | 4.753321  | -3.768243 | 1.054898  |
| C    | 4.849882  | -2.942272 | 2.152666  |
| C    | 3.944050  | -1.864543 | 2.305086  |
| C    | 2.974786  | -1.624260 | 1.354033  |
| C    | 0.897671  | 5.995293  | 1.054241  |
| C    | 0.137220  | 5.666133  | 2.154268  |
| C    | -0.346136 | 4.343841  | 2.306327  |
| C    | -0.075211 | 3.384930  | 1.353046  |
| H    | -5.518921 | -3.269453 | 2.919495  |
| H    | -3.076827 | -2.831889 | 3.194941  |
| H    | -1.840759 | -1.563963 | 1.497669  |

| Atom | X         | Y         | Z         |
|------|-----------|-----------|-----------|
| H    | -6.712700 | -2.388406 | 0.939165  |
| H    | -6.718305 | -1.124409 | -1.158765 |
| H    | -5.508482 | 0.201156  | -2.869700 |
| H    | -3.065659 | 0.574295  | -2.657909 |
| H    | -0.841739 | -2.335469 | -0.769653 |
| H    | 2.439529  | 0.436069  | -0.772902 |
| H    | -1.601292 | 1.891991  | -0.777091 |
| H    | 2.037374  | 2.360945  | -2.655215 |
| H    | 2.937937  | 4.662195  | -2.865410 |
| H    | 2.390357  | 6.374176  | -1.157655 |
| H    | 1.284716  | 7.004156  | 0.934994  |
| H    | -0.085652 | 6.414341  | 2.909377  |
| H    | -0.931663 | 4.081797  | 3.182872  |
| H    | -0.445401 | 2.375330  | 1.489960  |
| H    | 1.021885  | -2.957201 | -2.644527 |
| H    | 2.567146  | -4.885448 | -2.853572 |
| H    | 4.330990  | -5.257704 | -1.151285 |
| H    | 5.435303  | -4.606410 | 0.935718  |
| H    | 5.612119  | -3.119665 | 2.905799  |
| H    | 4.010664  | -1.224437 | 3.180104  |
| H    | 2.283745  | -0.800449 | 1.491515  |

**Table S6**

Computed fundamental vibrational wavenumbers of TNB used in the calculation of the ideal-gas heat capacities. The frequencies corresponding to the internal rotation were identified according to Ayala [3] and excluded from the table and further calculations.

| $\nu / \text{cm}^{-1}$ |
|------------------------|------------------------|------------------------|------------------------|------------------------|
| 32.5                   | 526.9                  | 906.8                  | 1212.8                 | 1594.9                 |
| 38.3                   | 558.6                  | 913.1                  | 1213.1                 | 1604.7                 |
| 38.8                   | 558.9                  | 919.4                  | 1213.6                 | 1606.6                 |
| 80.8                   | 586.5                  | 920.5                  | 1238.8                 | 1606.8                 |
| 83.4                   | 618.0                  | 948.0                  | 1239.3                 | 1632.3                 |
| 84.0                   | 618.1                  | 951.4                  | 1252.3                 | 1632.6                 |
| 133.8                  | 625.5                  | 951.7                  | 1263.8                 | 1632.7                 |
| 134.2                  | 625.6                  | 953.0                  | 1269.8                 | 3036.4                 |
| 168.7                  | 651.9                  | 967.4                  | 1270.2                 | 3036.9                 |
| 173.9                  | 658.4                  | 967.5                  | 1313.6                 | 3036.9                 |
| 174.5                  | 658.7                  | 968.5                  | 1331.1                 | 3039.6                 |
| 179.5                  | 662.7                  | 978.4                  | 1337.1                 | 3039.6                 |
| 201.1                  | 720.8                  | 978.7                  | 1337.2                 | 3039.6                 |
| 229.7                  | 730.4                  | 979.2                  | 1344.3                 | 3048.4                 |

| $\nu / \text{cm}^{-1}$ |
|------------------------|------------------------|------------------------|------------------------|------------------------|
| 229.9                  | 730.7                  | 988.3                  | 1370.6                 | 3048.5                 |
| 268.1                  | 733.8                  | 1009.0                 | 1370.7                 | 3048.8                 |
| 268.5                  | 733.8                  | 1009.0                 | 1371.3                 | 3049.7                 |
| 276.1                  | 734.8                  | 1026.4                 | 1394.1                 | 3049.9                 |
| 329.3                  | 776.0                  | 1029.9                 | 1394.5                 | 3050.2                 |
| 329.5                  | 776.1                  | 1030.2                 | 1407.6                 | 3057.3                 |
| 359.7                  | 776.6                  | 1063.4                 | 1422.5                 | 3057.6                 |
| 401.3                  | 786.3                  | 1069.5                 | 1423.1                 | 3058.8                 |
| 401.7                  | 787.9                  | 1069.9                 | 1443.3                 | 3062.3                 |
| 426.3                  | 788.2                  | 1123.1                 | 1448.2                 | 3062.6                 |
| 431.3                  | 797.4                  | 1123.6                 | 1448.4                 | 3062.7                 |
| 431.6                  | 797.8                  | 1125.0                 | 1466.0                 | 3063.8                 |
| 459.3                  | 798.6                  | 1146.9                 | 1466.1                 | 3063.8                 |
| 471.9                  | 803.8                  | 1147.1                 | 1466.7                 | 3064.0                 |
| 471.9                  | 860.0                  | 1147.8                 | 1519.1                 | 3078.7                 |
| 474.6                  | 860.6                  | 1162.0                 | 1519.4                 | 3078.8                 |
| 502.4                  | 863.5                  | 1162.2                 | 1519.7                 | 3079.0                 |
| 502.6                  | 865.9                  | 1163.2                 | 1587.5                 |                        |
| 518.0                  | 866.3                  | 1177.4                 | 1587.6                 |                        |
| 518.1                  | 892.6                  | 1177.7                 | 1589.7                 |                        |
| 519.6                  | 906.0                  | 1191.5                 | 1594.6                 |                        |

**Table S7**

Energy levels of hindered rotation of naphthyl substituents in TNB (all three naphthyl rotating tops are equivalent, therefore they have equal energy levels of hindered rotation).

| $\nu / \text{cm}^{-1}$ |
|------------------------|------------------------|------------------------|------------------------|------------------------|
| 15.2                   | 481.9                  | 1075.3                 | 1813.5                 | 2690.3                 |
| 20.7                   | 483.8                  | 1081.4                 | 1828.1                 | 2704.4                 |
| 37.8                   | 492.0                  | 1089.2                 | 1830.1                 | 2721.2                 |
| 38.7                   | 494.7                  | 1094.9                 | 1843.0                 | 2739.6                 |
| 54.2                   | 502.3                  | 1103.1                 | 1846.7                 | 2754.1                 |
| 56.6                   | 505.7                  | 1108.4                 | 1858.1                 | 2771.5                 |
| 70.2                   | 512.6                  | 1117.1                 | 1863.4                 | 2798.2                 |
| 74.1                   | 516.7                  | 1122.0                 | 1873.2                 | 2820.3                 |
| 85.9                   | 523.1                  | 1131.2                 | 1880.1                 | 2823.7                 |
| 90.6                   | 527.8                  | 1135.6                 | 1888.2                 | 2825.4                 |
| 101.3                  | 533.6                  | 1145.3                 | 1896.8                 | 2859.3                 |
| 106.7                  | 539.0                  | 1149.3                 | 1903.4                 | 2878.0                 |
| 116.6                  | 544.3                  | 1159.5                 | 1913.6                 | 2889.1                 |
| 121.1                  | 550.3                  | 1162.9                 | 1918.5                 | 2922.9                 |
| 122.6                  | 555.0                  | 1173.9                 | 1930.5                 | 2933.2                 |



| $\nu / \text{cm}^{-1}$ |
|------------------------|------------------------|------------------------|------------------------|------------------------|
| 131.6                  | 561.6                  | 1176.7                 | 1933.5                 | 2934.2                 |
| 137.9                  | 565.8                  | 1188.2                 | 1947.3                 | 2960.2                 |
| 140.4                  | 572.9                  | 1190.5                 | 1948.8                 | 2988.7                 |
| 146.2                  | 576.7                  | 1202.7                 | 1964.0                 | 2992.2                 |
| 153.1                  | 584.3                  | 1204.3                 | 1964.2                 | 3033.5                 |
| 158.6                  | 587.6                  | 1217.2                 | 1979.1                 | 3052.2                 |
| 160.4                  | 595.8                  | 1218.1                 | 1981.2                 | 3056.6                 |
| 167.8                  | 598.7                  | 1231.8                 | 1994.4                 | 3067.1                 |
| 174.1                  | 607.3                  | 1232.1                 | 1998.1                 | 3108.9                 |
| 175.9                  | 609.8                  | 1246.0                 | 2009.6                 | 3114.4                 |
| 182.2                  | 618.8                  | 1246.5                 | 2015.1                 | 3126.5                 |
| 187.2                  | 621.0                  | 1260.0                 | 2024.8                 | 3178.7                 |
| 192.2                  | 630.2                  | 1261.2                 | 2032.2                 | 3186.1                 |
| 196.3                  | 632.3                  | 1274.0                 | 2040.3                 | 3198.1                 |
| 199.5                  | 641.7                  | 1276.0                 | 2049.3                 | 3245.2                 |
| 199.8                  | 643.7                  | 1288.0                 | 2055.5                 | 3261.9                 |
| 207.2                  | 653.0                  | 1290.9                 | 2066.5                 | 3264.7                 |
| 209.8                  | 655.1                  | 1302.1                 | 2070.8                 | 3271.2                 |
| 210.9                  | 664.1                  | 1305.8                 | 2083.6                 | 3314.2                 |
| 215.0                  | 666.6                  | 1316.2                 | 2086.3                 | 3344.2                 |
| 219.7                  | 674.7                  | 1320.8                 | 2100.8                 | 3345.4                 |
| 221.3                  | 678.2                  | 1330.4                 | 2101.5                 | 3385.6                 |
| 222.7                  | 684.6                  | 1335.9                 | 2116.9                 | 3419.8                 |
| 228.2                  | 689.8                  | 1344.6                 | 2118.1                 | 3423.9                 |
| 228.6                  | 694.1                  | 1351.0                 | 2132.6                 | 3459.5                 |
| 233.1                  | 701.6                  | 1358.8                 | 2135.4                 | 3479.2                 |
| 234.5                  | 704.0                  | 1366.2                 | 2147.8                 | 3493.9                 |
| 239.3                  | 713.4                  | 1373.1                 | 2152.8                 | 3502.8                 |
| 239.4                  | 714.5                  | 1381.5                 | 2163.3                 | 3536.0                 |
| 243.7                  | 725.2                  | 1387.4                 | 2170.2                 | 3566.0                 |
| 245.8                  | 725.4                  | 1396.8                 | 2179.1                 | 3579.0                 |
| 247.2                  | 736.4                  | 1401.7                 | 2187.6                 | 3615.1                 |
| 252.2                  | 737.1                  | 1412.2                 | 2194.2                 | 3631.6                 |
| 252.6                  | 747.5                  | 1416.1                 | 2205.2                 | 3649.3                 |
| 257.4                  | 749.1                  | 1427.6                 | 2209.9                 | 3689.4                 |
| 259.7                  | 758.8                  | 1430.5                 | 2222.8                 | 3696.5                 |
| 263.2                  | 761.2                  | 1443.1                 | 2225.7                 | 3701.4                 |
| 267.1                  | 770.2                  | 1444.9                 | 2240.3                 | 3721.4                 |
| 269.3                  | 773.3                  | 1458.7                 | 2240.7                 | 3762.0                 |
| 274.8                  | 781.7                  | 1459.3                 | 2256.8                 | 3780.2                 |
| 275.7                  | 785.5                  | 1473.8                 | 2257.7                 | 3803.6                 |
| 282.3                  | 793.3                  | 1474.3                 | 2272.5                 | 3849.2                 |
| 282.6                  | 797.8                  | 1488.3                 | 2275.7                 | 3865.7                 |

| $\nu / \text{cm}^{-1}$ |
|------------------------|------------------------|------------------------|------------------------|------------------------|
| 289.2                  | 805.1                  | 1489.9                 | 2287.3                 | 3896.6                 |
| 290.7                  | 810.1                  | 1502.9                 | 2293.8                 | 3917.6                 |
| 296.3                  | 817.0                  | 1505.7                 | 2303.9                 | 3947.9                 |
| 299.0                  | 822.4                  | 1517.4                 | 2310.7                 | 3952.8                 |
| 303.6                  | 829.0                  | 1521.4                 | 2319.4                 | 4001.0                 |
| 307.4                  | 834.9                  | 1532.0                 | 2328.5                 | 4040.6                 |
| 311.1                  | 841.1                  | 1537.3                 | 2333.6                 | 4058.8                 |
| 316.0                  | 847.3                  | 1546.6                 | 2347.9                 | 4116.7                 |
| 318.8                  | 853.3                  | 1553.2                 | 2351.4                 | 4118.7                 |
| 324.8                  | 859.9                  | 1561.3                 | 2364.2                 | 4128.4                 |
| 326.7                  | 865.6                  | 1569.1                 | 2366.4                 | 4184.3                 |
| 333.8                  | 872.5                  | 1575.9                 | 2379.4                 | 4214.1                 |
| 334.8                  | 878.0                  | 1585.1                 | 2380.1                 | 4252.5                 |
| 342.9                  | 885.2                  | 1590.6                 | 2399.5                 | 4277.5                 |
| 343.0                  | 890.5                  | 1601.1                 | 2400.4                 | 4297.5                 |
| 351.3                  | 897.9                  | 1605.3                 | 2413.8                 | 4328.2                 |
| 352.1                  | 903.2                  | 1617.2                 | 2423.5                 | 4361.2                 |
| 359.8                  | 910.6                  | 1620.0                 | 2425.4                 | 4407.1                 |
| 361.5                  | 915.9                  | 1633.3                 | 2433.3                 | 4413.5                 |
| 368.5                  | 923.5                  | 1634.7                 | 2448.6                 | 4474.6                 |
| 371.1                  | 928.7                  | 1649.5                 | 2449.7                 | 4496.2                 |
| 377.3                  | 936.3                  | 1649.5                 | 2462.9                 | 4544.3                 |
| 380.7                  | 941.6                  | 1664.3                 | 2473.6                 | 4590.1                 |
| 386.2                  | 949.3                  | 1665.7                 | 2481.1                 | 4618.3                 |
| 390.5                  | 954.6                  | 1679.1                 | 2497.7                 | 4698.0                 |
| 395.2                  | 962.3                  | 1681.9                 | 2499.3                 | 4700.8                 |
| 400.5                  | 967.6                  | 1693.9                 | 2510.6                 | 4788.5                 |
| 404.4                  | 975.3                  | 1698.2                 | 2515.2                 | 4813.1                 |
| 410.5                  | 980.8                  | 1708.7                 | 2526.3                 | 4887.4                 |
| 413.7                  | 988.4                  | 1714.6                 | 2532.1                 | 4948.7                 |
| 420.7                  | 994.0                  | 1723.6                 | 2548.7                 | 4992.9                 |
| 423.1                  | 1001.5                 | 1731.0                 | 2570.7                 | 5095.6                 |
| 430.9                  | 1007.4                 | 1738.5                 | 2575.9                 | 5114.4                 |
| 432.6                  | 1014.7                 | 1747.4                 | 2582.5                 | 5245.6                 |
| 441.3                  | 1020.8                 | 1753.3                 | 2587.3                 | 5278.2                 |
| 442.3                  | 1028.0                 | 1763.9                 | 2603.2                 | 5401.6                 |
| 451.8                  | 1034.3                 | 1768.2                 | 2612.7                 | 5483.4                 |
| 452.0                  | 1041.3                 | 1780.4                 | 2628.9                 | 5573.0                 |
| 461.9                  | 1047.9                 | 1783.2                 | 2630.4                 | 5787.6                 |
| 462.4                  | 1054.6                 | 1796.9                 | 2631.3                 | 5818.5                 |
| 471.8                  | 1061.6                 | 1798.1                 | 2673.5                 | 6033.5                 |
| 473.1                  | 1068.0                 | 1813.1                 | 2683.6                 | 6427.8                 |

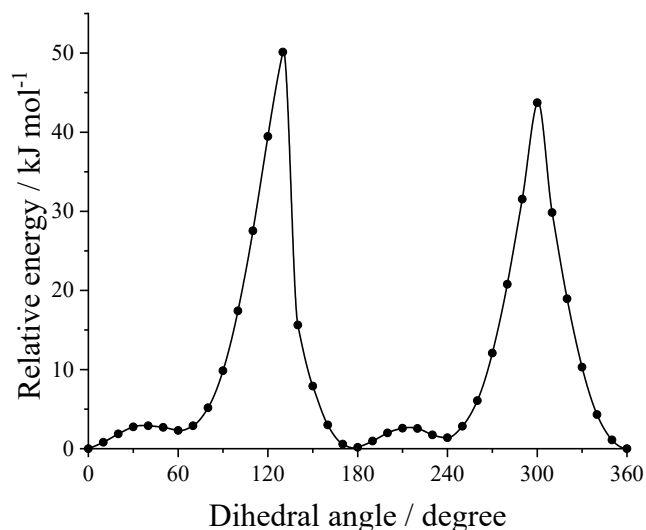

**Fig. S1.** Potential energy surface for internal rotation of naphthyl substituents in TNB. A dihedral angle of 0 degrees corresponds to the optimal configuration.

**Table S8**

Contributions of vibration and internal rotation to the heat capacities of TNB, as well as isochoric and isobaric heat capacities calculated in this work.

| $T / \text{K}$ | $C_{\text{v.vib}}(T) / \text{J K}^{-1} \text{mol}^{-1}$<br>a | $\Sigma C_{\text{v.ir}}(T) / \text{J K}^{-1}$<br>$\text{mol}^{-1}$ b | $C_{\text{v.m}}(T) / \text{J K}^{-1} \text{mol}^{-1}$ | $C_{\text{p.m}}(T) / \text{J K}^{-1} \text{mol}^{-1}$ |
|----------------|--------------------------------------------------------------|----------------------------------------------------------------------|-------------------------------------------------------|-------------------------------------------------------|
| 200            | 254.5                                                        | 24.0                                                                 | 303.4                                                 | 311.7                                                 |
| 220            | 287.6                                                        | 22.9                                                                 | 335.4                                                 | 343.7                                                 |
| 240            | 321.5                                                        | 22.1                                                                 | 368.6                                                 | 376.9                                                 |
| 260            | 356.0                                                        | 21.5                                                                 | 402.4                                                 | 410.7                                                 |
| 280            | 390.6                                                        | 20.9                                                                 | 436.5                                                 | 444.8                                                 |
| 298.15         | 421.9                                                        | 20.5                                                                 | 467.3                                                 | 475.7                                                 |
| 300            | 425.0                                                        | 20.5                                                                 | 470.5                                                 | 478.8                                                 |
| 320            | 459.1                                                        | 20.1                                                                 | 504.2                                                 | 512.5                                                 |
| 340            | 492.4                                                        | 19.9                                                                 | 537.2                                                 | 545.5                                                 |
| 360            | 525.0                                                        | 19.6                                                                 | 569.5                                                 | 577.8                                                 |
| 380            | 556.5                                                        | 19.4                                                                 | 600.9                                                 | 609.2                                                 |
| 400            | 587.0                                                        | 19.2                                                                 | 631.1                                                 | 639.5                                                 |
| 420            | 616.4                                                        | 19.0                                                                 | 660.3                                                 | 668.6                                                 |
| 440            | 644.6                                                        | 18.9                                                                 | 688.4                                                 | 696.7                                                 |
| 460            | 671.6                                                        | 18.7                                                                 | 715.2                                                 | 723.5                                                 |
| 480            | 697.4                                                        | 18.6                                                                 | 740.9                                                 | 749.3                                                 |
| 500            | 722.1                                                        | 18.4                                                                 | 765.5                                                 | 773.8                                                 |
| 520            | 745.7                                                        | 18.3                                                                 | 789.0                                                 | 797.3                                                 |
| 540            | 768.3                                                        | 18.2                                                                 | 811.4                                                 | 819.7                                                 |
| 560            | 789.8                                                        | 18.0                                                                 | 832.8                                                 | 841.1                                                 |

| $T / \text{K}$ | $C_{v,\text{vib}}(T) / \text{J K}^{-1} \text{mol}^{-1}$<br>a | $\sum C_{v,\text{ir}}(T) / \text{J K}^{-1}$<br>$\text{mol}^{-1}$ b | $C_{v,\text{m}}(T) / \text{J K}^{-1} \text{mol}^{-1}$ | $C_{p,\text{m}}(T) / \text{J K}^{-1} \text{mol}^{-1}$ |
|----------------|--------------------------------------------------------------|--------------------------------------------------------------------|-------------------------------------------------------|-------------------------------------------------------|
| 580            | 810.4                                                        | 17.9                                                               | 853.2                                                 | 861.5                                                 |
| 600            | 830.0                                                        | 17.8                                                               | 872.7                                                 | 881.0                                                 |
| 620            | 848.7                                                        | 17.7                                                               | 891.3                                                 | 899.7                                                 |
| 640            | 866.7                                                        | 17.5                                                               | 909.1                                                 | 917.5                                                 |
| 660            | 883.8                                                        | 17.4                                                               | 926.2                                                 | 934.5                                                 |
| 680            | 900.2                                                        | 17.3                                                               | 942.4                                                 | 950.8                                                 |
| 700            | 916.0                                                        | 17.1                                                               | 958.0                                                 | 966.3                                                 |
| 720            | 931.0                                                        | 17.0                                                               | 972.9                                                 | 981.3                                                 |
| 740            | 945.5                                                        | 16.8                                                               | 987.3                                                 | 995.6                                                 |
| 760            | 959.4                                                        | 16.7                                                               | 1001.0                                                | 1009.3                                                |
| 780            | 972.7                                                        | 16.5                                                               | 1014.1                                                | 1022.4                                                |
| 800            | 985.5                                                        | 16.4                                                               | 1026.8                                                | 1035.1                                                |

<sup>a</sup> Vibrational contribution to the heat capacity. Calculated based on the set of frequencies listed in Table S7 using Eq. (S1).

<sup>b</sup> Sum of the internal rotation contributions for all rotating tops of the molecule.

#### *The procedure of ideal gas phase heat capacities calculation*

According to the rigid rotor – harmonic oscillator model, the vibrational contribution to the molar heat capacity in the ideal gas phase can be calculated by Eq. (S1) with the set of frequencies from Table S6:

$$C_{v,\text{vib}} = R \cdot \sum_i \frac{\left(\frac{\Theta_i}{T}\right)^2 \cdot \exp\left(-\frac{\Theta_i}{T}\right)}{\left(\exp\left(-\frac{\Theta_i}{T}\right) - 1\right)^2}, \quad (\text{S1})$$

where  $\Theta_i$  is the  $i$ -th fundamental vibrational frequency of the molecule.

The contribution of hindered rotation from each rotating top is calculated by Eq. (S2) [4] using the energy levels listed in Table S7:

$$C_{v,\text{ir}} = \frac{\left( \sum_j \exp\left(-\frac{\varepsilon_j}{kT}\right) \cdot \sum_j \frac{\varepsilon_j^2}{kT^2} \exp\left(-\frac{\varepsilon_j}{kT}\right) \right) - \left( \sum_j \frac{\varepsilon_j}{kT^2} \exp\left(-\frac{\varepsilon_j}{kT}\right) \cdot \sum_j \varepsilon_j \exp\left(-\frac{\varepsilon_j}{kT}\right) \right)}{\left( \sum_j \exp\left(-\frac{\varepsilon_j}{kT}\right) \right)^2}, \quad (\text{S2})$$

where  $\varepsilon_j$  is the frequency of the  $j$ -th energy level.

The molar isobaric heat capacity in the ideal gas phase can be found by summing the contributions of vibration ( $C_{v,\text{vib}}$ ), internal rotation of all rotating tops ( $\sum C_{v,\text{ir}}$ ), translation ( $3/2 R$ ), overall rotation ( $3/2 R$ ), and the difference between isobaric and isochoric heat capacity ( $R$ ):

$$C_{p,\text{m}} = C_{v,\text{vib}} + \sum C_{v,\text{ir}} + C_{v,\text{tm}} + C_{v,\text{rot}} + (C_{p,\text{m}} - C_{v,\text{m}}) = C_{v,\text{vib}} + \sum C_{v,\text{ir}} + 4R \quad (\text{S3})$$

**Table S9**

Contributions of vibration and internal rotation to the entropies of TNB, as well as entropies themselves calculated in this work.

| $T / \text{K}$ | $S_{\text{vib}}(T) / \text{J K}^{-1} \text{mol}^{-1} \text{ }^{\text{a}}$ | $\sum S_{\text{ir}}(T) / \text{J K}^{-1} \text{mol}^{-1} \text{ }^{\text{b}}$ | $S(T) / \text{J K}^{-1} \text{mol}^{-1}$ |
|----------------|---------------------------------------------------------------------------|-------------------------------------------------------------------------------|------------------------------------------|
| 200            | 210.3                                                                     | 110.3                                                                         | 755.6                                    |
| 220            | 236.1                                                                     | 112.5                                                                         | 786.8                                    |
| 240            | 262.6                                                                     | 114.5                                                                         | 818.2                                    |
| 260            | 289.7                                                                     | 116.2                                                                         | 849.7                                    |
| 280            | 317.3                                                                     | 117.8                                                                         | 881.3                                    |
| 298.15         | 342.8                                                                     | 119.1                                                                         | 910.2                                    |
| 300            | 345.4                                                                     | 119.2                                                                         | 913.2                                    |
| 320            | 374.0                                                                     | 120.5                                                                         | 945.2                                    |
| 340            | 402.8                                                                     | 121.7                                                                         | 977.2                                    |
| 360            | 431.9                                                                     | 122.9                                                                         | 1009.3                                   |
| 380            | 461.1                                                                     | 123.9                                                                         | 1041.4                                   |
| 400            | 490.4                                                                     | 124.9                                                                         | 1073.4                                   |
| 420            | 519.8                                                                     | 125.9                                                                         | 1105.4                                   |
| 440            | 549.1                                                                     | 126.7                                                                         | 1137.1                                   |
| 460            | 578.4                                                                     | 127.6                                                                         | 1168.7                                   |
| 480            | 607.5                                                                     | 128.4                                                                         | 1200.0                                   |
| 500            | 636.5                                                                     | 129.1                                                                         | 1231.1                                   |
| 520            | 665.3                                                                     | 129.8                                                                         | 1261.9                                   |
| 540            | 693.8                                                                     | 130.5                                                                         | 1292.4                                   |
| 560            | 722.2                                                                     | 131.2                                                                         | 1322.6                                   |
| 580            | 750.2                                                                     | 131.8                                                                         | 1352.5                                   |
| 600            | 778.1                                                                     | 132.4                                                                         | 1382.0                                   |
| 620            | 805.6                                                                     | 133.0                                                                         | 1411.2                                   |
| 640            | 832.8                                                                     | 133.6                                                                         | 1440.1                                   |
| 660            | 859.7                                                                     | 134.1                                                                         | 1468.6                                   |
| 680            | 886.4                                                                     | 134.6                                                                         | 1496.7                                   |
| 700            | 912.7                                                                     | 135.1                                                                         | 1524.5                                   |
| 720            | 938.7                                                                     | 135.6                                                                         | 1551.9                                   |
| 740            | 964.4                                                                     | 136.1                                                                         | 1579.0                                   |
| 760            | 989.8                                                                     | 136.5                                                                         | 1605.8                                   |
| 780            | 1014.9                                                                    | 136.9                                                                         | 1632.1                                   |
| 800            | 1039.7                                                                    | 137.3                                                                         | 1658.2                                   |

<sup>a</sup> Vibrational contribution to the entropy. Calculated based on the set of frequencies listed in Table S6 using Eq. (S4).

<sup>b</sup> Sum of the internal rotation contributions for all rotating tops of the molecule.

*The procedure of ideal gas phase entropy calculation*

According to the rigid rotor – harmonic oscillator model, the vibrational contribution to the entropy in the ideal gas phase can be calculated by Eq. (S4) with the set of frequencies from Table S6:

$$S_{\text{vib}} = R \cdot \sum_i \left( \frac{\frac{\Theta_i}{T}}{\exp(\frac{\Theta_i}{T}) - 1} - \ln \left( 1 - \exp(-\frac{\Theta_i}{T}) \right) \right), \quad (\text{S4})$$

where  $\Theta_i$  is the  $i$ -th fundamental vibrational frequency of the molecule.

The contribution of hindered rotation from each rotating top is calculated by Eq. (S5) [4] using the energy levels listed in Table S7:

$$S_{\text{ir}} = k \ln \left( \frac{1}{\sigma_{\text{r}_i}} \sum_j \exp(-\frac{\varepsilon_j}{kT}) \right) + \frac{1}{T} \frac{\sum_j \varepsilon_j \exp(-\frac{\varepsilon_j}{kT})}{\sum_j \exp(-\frac{\varepsilon_j}{kT})}, \quad (\text{S5})$$

where  $\sigma_{\text{r}_i}$  is the internal symmetry number of the  $i$ -th rotating top ( $\sigma_{\text{r}_i} = 1$  for all naphthyl rotating tops of TNB) and  $\varepsilon_j$  is the frequency of the  $j$ -th energy level.

The translational entropy of an ideal gas was found using Eq. S6 ( $M = 456.6$  g/mol,  $P = 10^5$  Pa):

$$S_{\text{tm}} = R \ln \left[ \frac{1}{N_{\text{A}}} \cdot \left( \frac{2\pi M k T}{h^2 N_{\text{A}}} \right)^{3/2} \cdot \frac{RT}{P} \right] + \frac{5}{2} R \quad (\text{S6})$$

The rotational entropy of TNB was calculated using moments of inertia around principal axes ( $J_1 = J_2 = 8.80 \cdot 10^{-40}$  kg·m<sup>2</sup>,  $J_3 = 1.44 \cdot 10^{-39}$  kg·m<sup>2</sup>), the symmetry number of TNB ( $\sigma = 3$ ) and Eq. S7:

$$S_{\text{rot}} = R \ln \left[ \frac{\sqrt{\pi}}{\sigma} \cdot \sqrt{J_1 J_2 J_3} \cdot \left( \frac{8\pi^2 k T}{h^2} \right)^{3/2} \right] + \frac{3}{2} R \quad (\text{S7})$$

The entropy in the ideal gas phase can be found by summing the contributions of vibration ( $S_{\text{vib}}$ ), internal rotation of all rotating tops ( $\sum S_{\text{ir}}$ ), translation ( $S_{\text{tm}}$ ) and overall rotation ( $S_{\text{rot}}$ ):

$$S = S_{\text{vib}} + \sum S_{\text{ir}} + S_{\text{tm}} + S_{\text{rot}} \quad (\text{S8})$$

**Table S10**

Molar refractions of TNB derived according to Eq. (10) of the manuscript and experimentally measured densities and refractive indices of TNB solutions in benzene at 298.15 K required for its calculation (uncertainties are expressed as standard deviation).

| Compound                                                                             | Mole fraction<br>$\times 10^3$ <sup>a</sup> | Density <sup>b</sup> /<br>$\text{g}\cdot\text{cm}^{-3}$ | Refractive<br>index <sup>c</sup> | MR / $\text{cm}^3\cdot\text{mol}^{-1}$ |
|--------------------------------------------------------------------------------------|---------------------------------------------|---------------------------------------------------------|----------------------------------|----------------------------------------|
| TNB                                                                                  | 1.026                                       | 0.875156                                                | 1.49872                          | 154.8                                  |
|                                                                                      | 1.700                                       | 0.876125                                                | 1.49931                          | 152.5                                  |
|                                                                                      | 2.652                                       | 0.877482                                                | 1.50043                          | 156.2                                  |
| Density (benzene) = $0.873666 \text{ g}\cdot\text{cm}^{-3}$                          |                                             |                                                         |                                  |                                        |
| Refractive index (benzene) = 1.49768                                                 |                                             |                                                         |                                  |                                        |
| <b>MR = <math>154.5 \pm 3.2 \text{ cm}^3\cdot\text{mol}^{-1}</math> <sup>d</sup></b> |                                             |                                                         |                                  |                                        |

<sup>a</sup> Mole fraction of TNB in benzene solutions. Standard uncertainty  $u$  is 0.002.

<sup>b</sup> Density of TNB solution in benzene at a given molality (accuracy stated by the device manufacturer is  $\pm 0.000007 \text{ g}\cdot\text{cm}^{-3}$ ).

<sup>c</sup> Refractive index of TNB solution in benzene at a given molality (accuracy stated by the device manufacturer is  $\pm 0.00010$ ).

<sup>d</sup> The standard uncertainty of the mean MR value is the propagated error, including the reproducibility of experimental MR and uncertainties of the refractive index and density.

## References

1. Buzyurov, A.V.; Nagrimanov, R.N.; Zaitsau, D.H.; Mukhametzhanov, T.A.; Solomonov, B.N.; Abdelaziz, A.; Schick, C. Application of the Flash DSC 1 and 2+ for vapor pressure determination above solids and liquids. *Thermochimica Acta* **2021**, *706*, 179067, doi:10.1016/j.tca.2021.179067.
2. Ziganshin, M.A.; Gerasimov, A.V.; Ziganshina, S.A.; Gubina, N.S.; Abdullina, G.R.; Klimovitskii, A.E.; Gorbachuk, V.V.; Bukharaev, A.A. Thermally induced diphenylalanine cyclization in solid phase. *Journal of Thermal Analysis and Calorimetry* **2016**, *125*, 905-912.
3. Ayala, P.Y.; Schlegel, H.B. Identification and treatment of internal rotation in normal mode vibrational analysis. *The Journal of Chemical Physics* **1998**, *108*, 2314-2325.
4. Pfaendtner, J.; Yu, X.; Broadbelt, L.J. The 1-D hindered rotor approximation. *Theoretical Chemistry Accounts* **2007**, *118*, 881-898.
